# Supplementary material for: Systematic Bioinformatics Analysis Based on Public and Second-Generation Sequencing Transcriptome Data: A Study on the Diagnostic Value and Potential Mechanisms of Immune-Related Genes in Acute Myocardial Infarction
Source: Front Cardiovasc Med. 2022 Apr 14;9:863248. doi: 10.3389/fcvm.2022.863248 (PMC9046674; doi:10.3389/fcvm.2022.863248)
Supplement: Supplementary file 1 [file Table_1.XLSX]

## Sheet: GO_CC_enrich
ID	Description	GeneRatio	BgRatio	pvalue	p.adjust	qvalue	geneID	Count
GO:0070820	tertiary granule	6/51	164/19717	3.99248e-06	0.00040324	0.000332006	CR1/MCEMP1/FOLR3/MGAM/MMP9/HP	6
GO:0042581	specific granule	5/51	160/19717	5.74399e-05	0.00290072	0.00238829	SLPI/ANXA3/MCEMP1/FOLR3/HP	5
GO:1904724	tertiary granule lumen	3/51	55/19717	0.000389019	0.013097	0.0107833	FOLR3/MMP9/HP	3
GO:0035580	specific granule lumen	3/51	62/19717	0.000553707	0.0139811	0.0115113	SLPI/FOLR3/HP	3
GO:0030139	endocytic vesicle	5/51	303/19717	0.00109237	0.0203638	0.0167665	ANXA3/NCF4/GNLY/FCGR1B/HP	5
GO:0071682	endocytic vesicle lumen	2/51	20/19717	0.00120973	0.0203638	0.0167665	GNLY/HP	2
GO:0060205	cytoplasmic vesicle lumen	5/51	338/19717	0.00176934	0.0226285	0.0186311	S100A12/SLPI/GNLY/FOLR3/HP	5
GO:0031983	vesicle lumen	5/51	339/19717	0.00179236	0.0226285	0.0186311	S100A12/SLPI/GNLY/FOLR3/HP	5
GO:0001772	immunological synapse	2/51	36/19717	0.00390664	0.0438412	0.0360964	GZMB/GZMA	2
GO:0045335	phagocytic vesicle	3/51	132/19717	0.00483138	0.048797	0.0401768	ANXA3/NCF4/GNLY	3
GO:0030667	secretory granule membrane	4/51	298/19717	0.00731735	0.0671865	0.0553177	CR1/VNN1/MCEMP1/MGAM	4
GO:0034774	secretory granule lumen	4/51	321/19717	0.00944779	0.0795189	0.0654715	S100A12/SLPI/FOLR3/HP	4
GO:0101003	ficolin-1-rich granule membrane	2/51	61/19717	0.0108906	0.0828024	0.068175	CR1/MGAM	2
GO:0101002	ficolin-1-rich granule	3/51	185/19717	0.012168	0.0828024	0.068175	CR1/MGAM/MMP9	3
GO:0001533	cornified envelope	2/51	65/19717	0.0122974	0.0828024	0.068175	DSC2/PI3	2
GO:0070821	tertiary granule membrane	2/51	73/19717	0.0153349	0.0968012	0.0797009	MCEMP1/MGAM	2
GO:0009897	external side of plasma membrane	4/51	393/19717	0.0186058	0.11054	0.0910127	KLRD1/P2RY12/TGFBR3/FOLR3	4
GO:0031838	haptoglobin-hemoglobin complex	1/51	11/19717	0.0280945	0.157641	0.129793	HP	1
GO:0005767	secondary lysosome	1/51	14/19717	0.0356214	0.183328	0.150942	NCF4	1
GO:0005913	cell-cell adherens junction	2/51	117/19717	0.0368545	0.183328	0.150942	SMAD7/DSC2	2
GO:0043020	NADPH oxidase complex	1/51	15/19717	0.0381176	0.183328	0.150942	NCF4	1
GO:0031362	anchored component of external side of plasma membrane	1/51	19/19717	0.0480394	0.204036	0.167992	FOLR3	1
GO:0043186	P granule	1/51	20/19717	0.0505041	0.204036	0.167992	TDRD9	1
GO:0045495	pole plasm	1/51	20/19717	0.0505041	0.204036	0.167992	TDRD9	1
GO:0060293	germ plasm	1/51	20/19717	0.0505041	0.204036	0.167992	TDRD9	1
GO:0031233	intrinsic component of external side of plasma membrane	1/51	24/19717	0.0603005	0.234244	0.192864	FOLR3	1
GO:0030057	desmosome	1/51	25/19717	0.0627341	0.234672	0.193216	DSC2	1
GO:0030666	endocytic vesicle membrane	2/51	167/19717	0.0694303	0.235906	0.194232	ANXA3/FCGR1B	2
GO:0044298	cell body membrane	1/51	28/19717	0.0699979	0.235906	0.194232	P2RY12	1
GO:0031225	anchored component of membrane	2/51	170/19717	0.0716083	0.235906	0.194232	VNN1/FOLR3	2
GO:0016342	catenin complex	1/51	29/19717	0.0724068	0.235906	0.194232	SMAD7	1

## Sheet: GO_MF_enrich
ID	Description	GeneRatio	BgRatio	pvalue	p.adjust	qvalue	geneID	Count
GO:0048185	activin binding	2/47	14/17697	0.000615584	0.0409922	0.0315439	SMAD7/TGFBR3	2
GO:0030246	carbohydrate binding	5/47	271/17697	0.000735972	0.0409922	0.0315439	KLRB1/KLRF1/KLRD1/KLRC3/MGAM	5
GO:0004252	serine-type endopeptidase activity	4/47	160/17697	0.000848115	0.0409922	0.0315439	GZMB/GZMA/MMP9/HP	4
GO:0008236	serine-type peptidase activity	4/47	182/17697	0.00136704	0.0429436	0.0330456	GZMB/GZMA/MMP9/HP	4
GO:0017171	serine hydrolase activity	4/47	186/17697	0.00148082	0.0429436	0.0330456	GZMB/GZMA/MMP9/HP	4
GO:0019955	cytokine binding	3/47	128/17697	0.00475175	0.114834	0.0883658	TGFBR3/NOG/IL1R2	3
GO:0019838	growth factor binding	3/47	137/17697	0.00573912	0.118882	0.0914807	TGFBR3/FGFBP2/IL1R2	3
GO:0005126	cytokine receptor binding	4/47	286/17697	0.00690442	0.125143	0.0962984	SMAD7/TGFBR3/TLR5/PF4V1	4
GO:0005160	transforming growth factor beta receptor binding	2/47	51/17697	0.00810272	0.130544	0.100455	SMAD7/TGFBR3	2
GO:0005518	collagen binding	2/47	67/17697	0.0136784	0.164295	0.126427	SMAD7/MMP9	2
GO:0046332	SMAD binding	2/47	80/17697	0.019128	0.164295	0.126427	SMAD7/TGFBR3	2
GO:0004867	serine-type endopeptidase inhibitor activity	2/47	94/17697	0.0258464	0.164295	0.126427	SLPI/PI3	2
GO:0005072	transforming growth factor beta receptor, cytoplasmic mediator activity	1/47	10/17697	0.0262496	0.164295	0.126427	SMAD7	1
GO:0016176	superoxide-generating NADPH oxidase activator activity	1/47	10/17697	0.0262496	0.164295	0.126427	NCF4	1
GO:0004175	endopeptidase activity	4/47	427/17697	0.0263664	0.164295	0.126427	GZMB/GZMA/MMP9/HP	4
GO:0004896	cytokine receptor activity	2/47	96/17697	0.0268741	0.164295	0.126427	IL4R/IL1R2	2
GO:0015250	water channel activity	1/47	11/17697	0.0288372	0.164295	0.126427	AQP9	1
GO:0019864	IgG binding	1/47	11/17697	0.0288372	0.164295	0.126427	FCGR1B	1
GO:0034713	type I transforming growth factor beta receptor binding	1/47	11/17697	0.0288372	0.164295	0.126427	SMAD7	1
GO:0050786	RAGE receptor binding	1/47	11/17697	0.0288372	0.164295	0.126427	S100A12	1
GO:0052650	NADP-retinol dehydrogenase activity	1/47	11/17697	0.0288372	0.164295	0.126427	AKR1C3	1
GO:0070411	I-SMAD binding	1/47	11/17697	0.0288372	0.164295	0.126427	SMAD7	1
GO:0004859	phospholipase inhibitor activity	1/47	12/17697	0.031418	0.164295	0.126427	ANXA3	1
GO:0005372	water transmembrane transporter activity	1/47	12/17697	0.031418	0.164295	0.126427	AQP9	1
GO:0005542	folic acid binding	1/47	12/17697	0.031418	0.164295	0.126427	FOLR3	1
GO:0001608	G protein-coupled nucleotide receptor activity	1/47	13/17697	0.0339921	0.164295	0.126427	P2RY12	1
GO:0004032	alditol:NADP+ 1-oxidoreductase activity	1/47	13/17697	0.0339921	0.164295	0.126427	AKR1C3	1
GO:0004467	long-chain fatty acid-CoA ligase activity	1/47	13/17697	0.0339921	0.164295	0.126427	ACSL1	1
GO:0045028	G protein-coupled purinergic nucleotide receptor activity	1/47	13/17697	0.0339921	0.164295	0.126427	P2RY12	1
GO:0086080	protein binding involved in heterotypic cell-cell adhesion	1/47	13/17697	0.0339921	0.164295	0.126427	DSC2	1
GO:0015926	glucosidase activity	1/47	14/17697	0.0365596	0.167855	0.129166	MGAM	1
GO:0001846	opsonin binding	1/47	15/17697	0.0391203	0.167855	0.129166	CR1	1
GO:0005024	transforming growth factor beta-activated receptor activity	1/47	15/17697	0.0391203	0.167855	0.129166	TGFBR3	1
GO:0003996	acyl-CoA ligase activity	1/47	16/17697	0.0416744	0.167855	0.129166	ACSL1	1
GO:0005149	interleukin-1 receptor binding	1/47	16/17697	0.0416744	0.167855	0.129166	TLR5	1
GO:0030280	structural constituent of epidermis	1/47	16/17697	0.0416744	0.167855	0.129166	PI3	1
GO:0004675	transmembrane receptor protein serine/threonine kinase activity	1/47	17/17697	0.0442218	0.168741	0.129848	TGFBR3	1
GO:0055102	lipase inhibitor activity	1/47	17/17697	0.0442218	0.168741	0.129848	ANXA3	1
GO:0034458	3'-5' RNA helicase activity	1/47	19/17697	0.0492968	0.171306	0.131822	TDRD9	1
GO:0001614	purinergic nucleotide receptor activity	1/47	20/17697	0.0518245	0.171306	0.131822	P2RY12	1
GO:0004745	retinol dehydrogenase activity	1/47	20/17697	0.0518245	0.171306	0.131822	AKR1C3	1
GO:0016502	nucleotide receptor activity	1/47	20/17697	0.0518245	0.171306	0.131822	P2RY12	1
GO:0001848	complement binding	1/47	21/17697	0.0543455	0.171306	0.131822	CR1	1
GO:0008106	alcohol dehydrogenase (NADP+) activity	1/47	21/17697	0.0543455	0.171306	0.131822	AKR1C3	1
GO:0015645	fatty acid ligase activity	1/47	21/17697	0.0543455	0.171306	0.131822	ACSL1	1
GO:0022829	wide pore channel activity	1/47	21/17697	0.0543455	0.171306	0.131822	PRF1	1
GO:0050431	transforming growth factor beta binding	1/47	22/17697	0.05686	0.175419	0.134987	TGFBR3	1
GO:0017134	fibroblast growth factor binding	1/47	23/17697	0.0593679	0.17934	0.138004	TGFBR3	1
GO:0019865	immunoglobulin binding	1/47	24/17697	0.0618693	0.179511	0.138136	FCGR1B	1
GO:0023023	MHC protein complex binding	1/47	25/17697	0.0643642	0.179511	0.138136	KLRD1	1
GO:0035586	purinergic receptor activity	1/47	25/17697	0.0643642	0.179511	0.138136	P2RY12	1
GO:0004033	aldo-keto reductase (NADP) activity	1/47	26/17697	0.0668526	0.179511	0.138136	AKR1C3	1
GO:0016405	CoA-ligase activity	1/47	26/17697	0.0668526	0.179511	0.138136	ACSL1	1
GO:0016628	oxidoreductase activity, acting on the CH-CH group of donors, NAD or NADP as acceptor	1/47	26/17697	0.0668526	0.179511	0.138136	AKR1C3	1
GO:0008201	heparin binding	2/47	169/17697	0.0741276	0.192329	0.147999	TGFBR3/PF4V1	2
GO:0033764	steroid dehydrogenase activity, acting on the CH-OH group of donors, NAD or NADP as acceptor	1/47	29/17697	0.0742789	0.192329	0.147999	AKR1C3	1
GO:0016878	acid-thiol ligase activity	1/47	30/17697	0.0767415	0.193301	0.148747	ACSL1	1
GO:0004857	enzyme inhibitor activity	3/47	375/17697	0.0773203	0.193301	0.148747	SLPI/ANXA3/PI3	3
GO:0004866	endopeptidase inhibitor activity	2/47	175/17697	0.0787198	0.193464	0.148872	SLPI/PI3	2
GO:0030414	peptidase inhibitor activity	2/47	182/17697	0.0841882	0.200119	0.153994	SLPI/PI3	2
GO:0061135	endopeptidase regulator activity	2/47	182/17697	0.0841882	0.200119	0.153994	SLPI/PI3	2
GO:0016229	steroid dehydrogenase activity	1/47	35/17697	0.0889586	0.204746	0.157554	AKR1C3	1
GO:0016620	oxidoreductase activity, acting on the aldehyde or oxo group of donors, NAD or NADP as acceptor	1/47	35/17697	0.0889586	0.204746	0.157554	AKR1C3	1
GO:0015144	carbohydrate transmembrane transporter activity	1/47	37/17697	0.093801	0.212518	0.163535	AQP9	1
GO:0016709	oxidoreductase activity, acting on paired donors, with incorporation or reduction of molecular oxygen, NAD(P)H as one donor, and incorporation of one atom of oxygen	1/47	39/17697	0.0986182	0.215405	0.165756	AKR1C3	1
GO:0032266	phosphatidylinositol-3-phosphate binding	1/47	39/17697	0.0986182	0.215405	0.165756	NCF4	1
GO:0016877	ligase activity, forming carbon-sulfur bonds	1/47	40/17697	0.101017	0.215405	0.165756	ACSL1	1
GO:0042287	MHC protein binding	1/47	40/17697	0.101017	0.215405	0.165756	KLRD1	1
GO:0016903	oxidoreductase activity, acting on the aldehyde or oxo group of donors	1/47	43/17697	0.108177	0.225775	0.173736	AKR1C3	1
GO:0015026	coreceptor activity	1/47	44/17697	0.110552	0.225775	0.173736	TGFBR3	1
GO:1901618	organic hydroxy compound transmembrane transporter activity	1/47	44/17697	0.110552	0.225775	0.173736	AQP9	1
GO:0061134	peptidase regulator activity	2/47	219/17697	0.114845	0.231285	0.177976	SLPI/PI3	2
GO:0042887	amide transmembrane transporter activity	1/47	47/17697	0.117638	0.233664	0.179807	AQP9	1
GO:0008009	chemokine activity	1/47	49/17697	0.122331	0.237854	0.183031	PF4V1	1
GO:0005539	glycosaminoglycan binding	2/47	229/17697	0.123569	0.237854	0.183031	TGFBR3/PF4V1	2
GO:0098632	cell-cell adhesion mediator activity	1/47	50/17697	0.124668	0.237854	0.183031	DSC2	1
GO:0008146	sulfotransferase activity	1/47	52/17697	0.129325	0.241625	0.185933	SULT1B1	1
GO:0001102	RNA polymerase II activating transcription factor binding	1/47	53/17697	0.131644	0.241625	0.185933	TBX21	1
GO:0005544	calcium-dependent phospholipid binding	1/47	53/17697	0.131644	0.241625	0.185933	ANXA3	1
GO:0001227	DNA-binding transcription repressor activity, RNA polymerase II-specific	2/47	242/17697	0.135145	0.24495	0.188492	TBX21/NFIL3	2
GO:1901681	sulfur compound binding	2/47	250/17697	0.142388	0.251044	0.193181	TGFBR3/PF4V1	2
GO:0016627	oxidoreductase activity, acting on the CH-CH group of donors	1/47	58/17697	0.143149	0.251044	0.193181	AKR1C3	1
GO:0005507	copper ion binding	1/47	59/17697	0.145432	0.251044	0.193181	S100A12	1
GO:0098631	cell adhesion mediator activity	1/47	59/17697	0.145432	0.251044	0.193181	DSC2	1
GO:0016655	oxidoreductase activity, acting on NAD(P)H, quinone or similar compound as acceptor	1/47	60/17697	0.14771	0.251975	0.193897	AKR1C3	1
GO:0048306	calcium-dependent protein binding	1/47	61/17697	0.149981	0.252875	0.19459	ANXA3	1
GO:0019843	rRNA binding	1/47	63/17697	0.154506	0.257509	0.198156	RPS11	1
